# Supplementary material
Source: PubMed Central journal article supplement (PMC4685747)
Supplement: NIHMS65854-supplement-1.pdf [file NIHMS65854-supplement-1.pdf]

## SUPPLEMENTAL DATA

### Priming of qualitatively superior human effector CD8<sup>+</sup> T cells using TLR8 ligand combined with FLT3L

Running title: Enhanced T cell priming in humans

**Anna Lissina,<sup>\*\*†</sup> Olivia Briceño,<sup>\*\*†</sup> Georgia Afonso,<sup>‡¶§</sup> Martin Larsen,<sup>\*\*†</sup> Emma Gostick,<sup>||</sup>  
David A Price,<sup>||</sup> Roberto Mallone,<sup>‡¶§#</sup> and Victor Appay<sup>\*\*†</sup>**

\* Sorbonne Universités, UPMC Univ Paris 06, DHU FAST, CR7, Centre d'Immunologie et des Maladies Infectieuses (CIMI-Paris), Paris, France

† INSERM, U1135, CIMI-Paris, Paris, France

‡ INSERM, U1016, Institut Cochin, Paris, France

¶ CNRS, UMR8104, Institut Cochin, Paris, France

§ Université Paris Descartes, Sorbonne Paris Cité, Faculté de Médecine, Paris, France

|| Institute of Infection and Immunity, Cardiff University School of Medicine, Cardiff, Wales, UK

# Assistance Publique-Hôpitaux de Paris, Hôpital Cochin, Service de Diabétologie, Paris, France

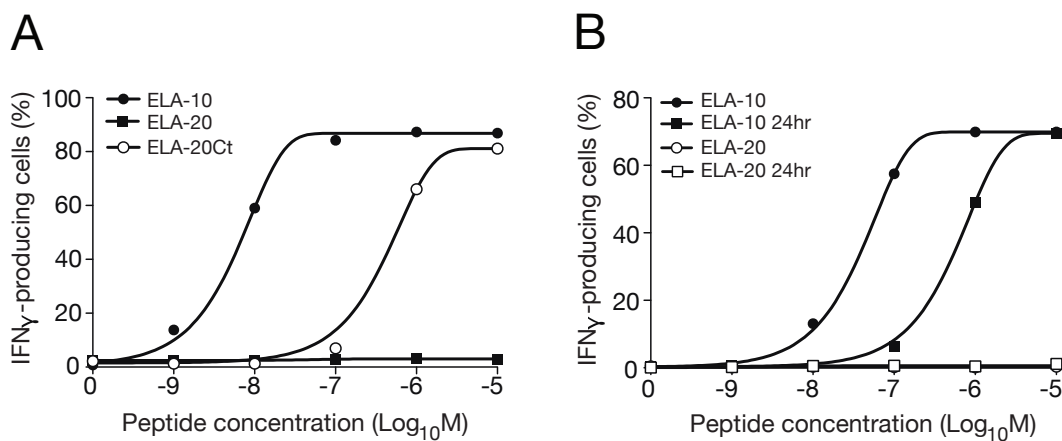

**Supplemental Figure 1. Surface presentation and stability of long versus short synthetic ELA peptides.** **A.** IFN $\gamma$  production by the Mel9916 ELA-specific CD8<sup>+</sup> T cell line in response to HLA-A2<sup>+</sup> B-LCL target cells pulsed with the optimal ELA-10 peptide or two different versions of the 20mer peptide (ELA-20 or ELA-20Ct) over a range of concentrations was measured via intracellular cytokine staining. The ELA-20Ct peptide, which contains the ELA epitope sequence at the C-terminal end, partially activated cognate CD8<sup>+</sup> T cells without the need for processing and was subsequently eliminated from the study. The ELA-20 peptide did not bind directly to HLA-A2. **B.** The ELA-20 peptide was tested in a stability assay to determine if non-specific cleavage by enzymes present in serum could liberate the optimal ELA-10 epitope. IFN $\gamma$  production by the Mel9916 ELA-specific CD8<sup>+</sup> T cell line was measured as in (A). Prior to B-LCL pulsing, peptides were either handled normally or incubated with 10% v/v FCS for 24 hours at 37°C. Incubation with 10% v/v FCS reduced the antigenicity of the ELA-10 peptide by 1 log<sub>10</sub>M, but did not generate functionally active fragments from the ELA-20 peptide.

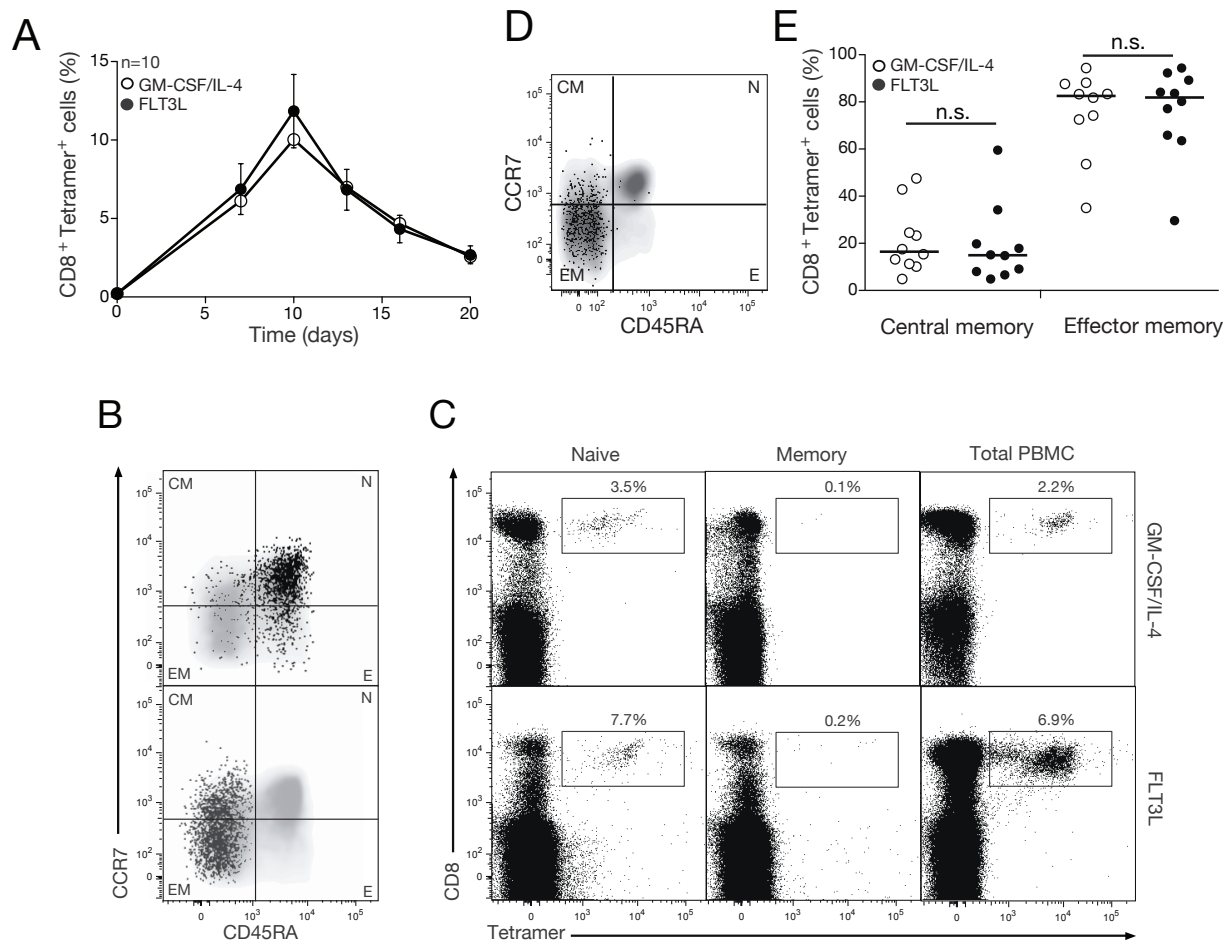

**Supplemental Figure 2. *In vitro* priming of ELA-specific CD8<sup>+</sup> T cells from naïve precursors.**

**A.** Comparison of ELA-specific CD8<sup>+</sup> T cell priming kinetics from HLA-A2<sup>+</sup> PBMC samples (n=10) using either GM-CSF/IL-4 or FLT3L in combination with a cocktail of inflammatory cytokines (TNF, IL-1 $\beta$ , PGE2 and IL-7). Error bars indicate SEM. **B.** Phenotypic profiles of purified naïve (top plot) or memory (bottom plot) CD8<sup>+</sup> T cell subsets (black dots) overlaid on the phenotypic distribution of peripheral blood CD8<sup>+</sup> T cells (grey density plot). CM, central memory; E, effector; EM, effector memory; N, naïve. Naïve (CCR7<sup>+</sup> CD45RA<sup>+</sup>) and memory (CCR7<sup>+</sup> CD45RA<sup>-</sup>) CD8<sup>+</sup> T cell populations were isolated from HLA-A2<sup>+</sup> PBMCs prior to reconstitution with CD8-depleted PBMCs in priming experiments. Unmanipulated PBMCs from the same donor were primed in parallel. **C.** Representative flow cytometry plots showing ELA/HLA-A2 tetramer<sup>+</sup> CD8<sup>+</sup> T cells on day 10 post-priming in the presence of either GM-CSF/IL-4 (top row) or FLT3L (bottom row) together with the inflammatory cytokine cocktail. Percentages of ELA/HLA-A2 tetramer<sup>+</sup> cells within the total CD8<sup>+</sup> gate are indicated. **D.** Representative phenotypic analysis of ELA-specific CD8<sup>+</sup> T cells on day 10 post-priming. ELA/HLA-A2 tetramer<sup>+</sup> CD8<sup>+</sup> events are shown as black dots superimposed on density plots depicting the phenotypic distribution of

peripheral blood CD8<sup>+</sup> T cells. **E.** Phenotypic characterization of ELA/HLA-A2 tetramer<sup>+</sup> CD8<sup>+</sup> T cells primed from the donors shown in (A). Horizontal bars indicate median values. Statistical comparisons between groups were performed using the Wilcoxon signed rank test.

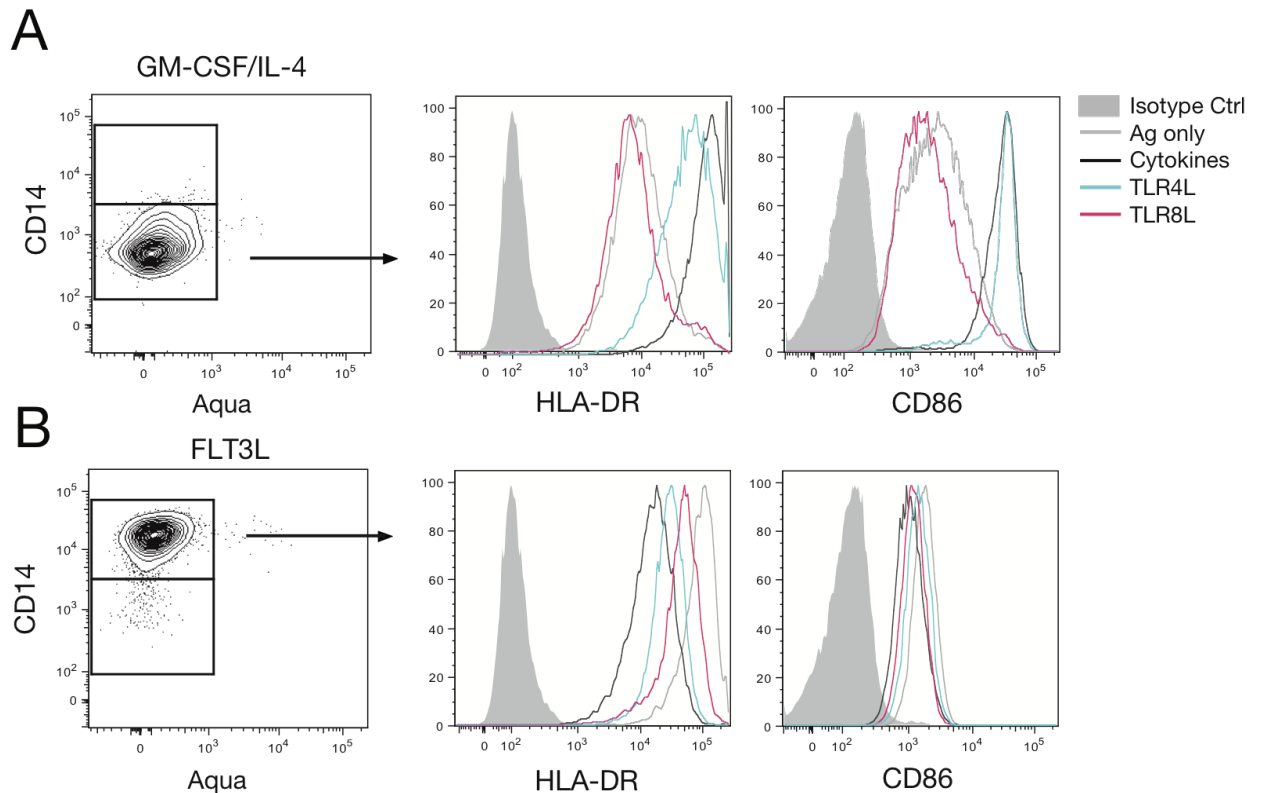

**Supplemental Figure 3. Tracing the expression of CD14, HLA-DR and CD86 on purified monocytes, exposed to different maturation conditions.** Expression of CD14, HLA-DR and CD86 on monocytes (initially purified with magnetic microbeads, on the basis of CD14 expression) differentiated *in vitro* using GMCSF/IL-4 (**A**) or FLT3L (**B**), and cultured for two days with ELA antigen alone (grey lines) or in the additional presence of the following maturation factors: cytokines (TNF- $\alpha$ , PGE2, IL-1 $\beta$  and IL-7; black lines), TLR4L (blue lines) or TLR8L (pink lines).
